# Supplementary material
Source: publisher site journal article supplement (https://www.dovepress.com/article/356451)
Supplement: Supplementary file 1 [file get_supplementary_file.php]

**Supplementary materials**

**Figure S1 Detection of relative expression level of miRs in responding to RUS administration. The miR for subsequent assays is determined based on the p value, and the miR with smallest p value is selected.**


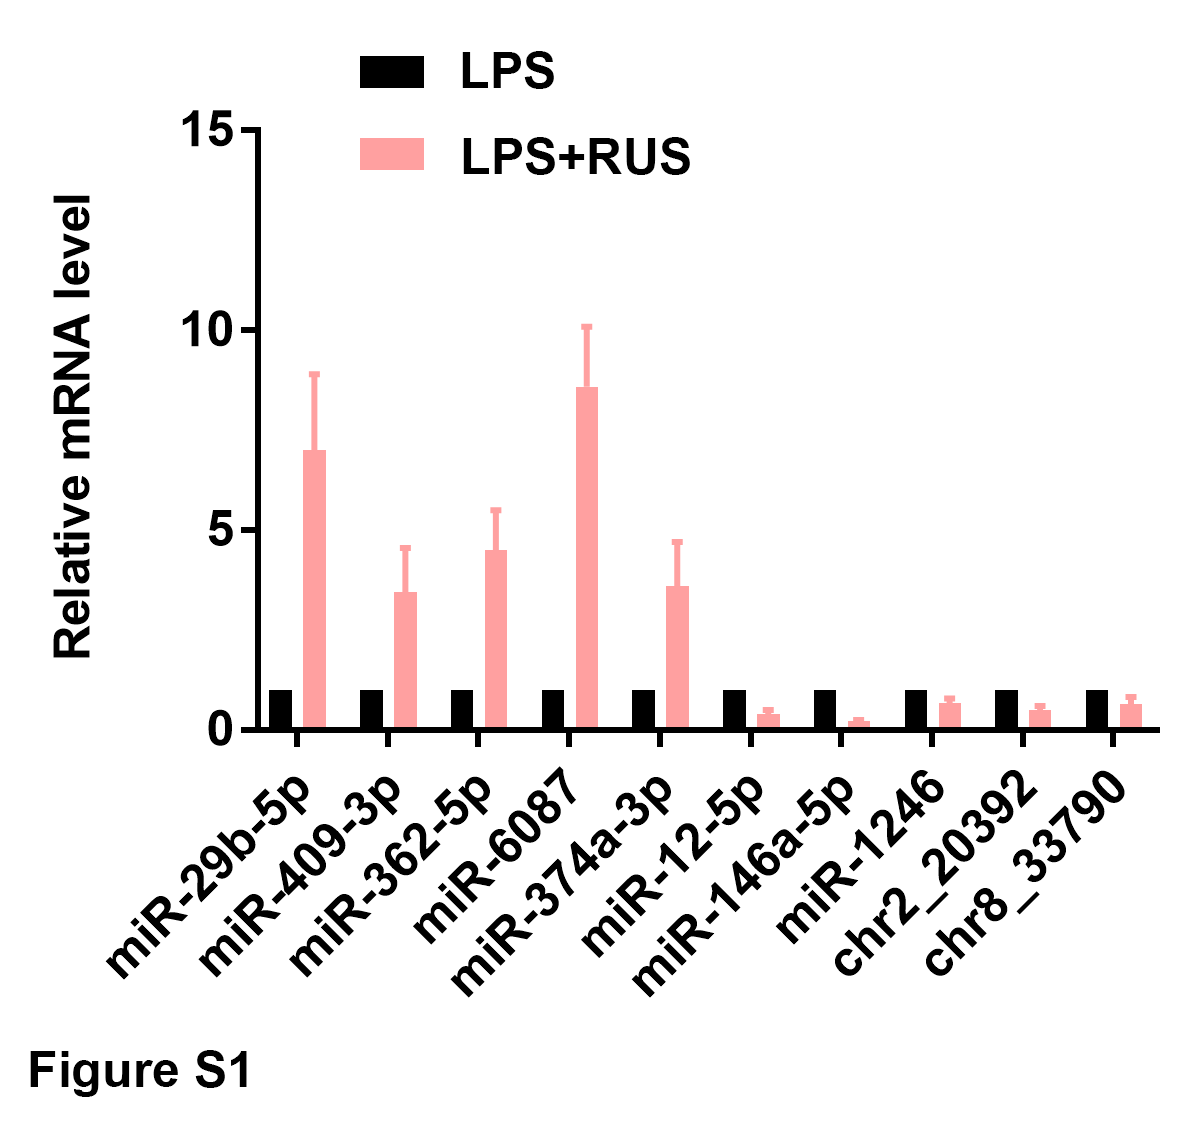


**Table S1 Information of up-regulated miRs**

| **miRNA information** | | | **TagCount_Mature_Alone** | | **TagCount_Most_Abundant_Seq** | | **TagCount_ALL_Isoform** | | **Fold Change** |
| --- | --- | --- | --- | --- | --- | --- | --- | --- | --- |
| **MATURE-ID** | **pre-miRNA arm (5p or 3p)** | **PRE-ID** | **Model** | **Control** | **Model** | **Control** | **Model** | **Control** | **Model vs Control Fold change** |
| hsa-miR-12-5p | 5p | hsa-mir-122 | 53158 | 6 | 53158 | 6 | 211611 | 21 | 6826.483871 |
| hsa-miR-146a-5p | 5p | hsa-mir-146a | 827 |  | 5649 |  | 26332 | 2 | 2195.166667 |
| hsa-miR-1246 | 5p | hsa-mir-1246 | 189 | 3 | 739 | 1 | 5782 | 28 | 152.421053 |
| hsa-miR-novel-chr2_20392 | 5p | hsa-mir-novel-chr2_20390 | 284 | 2 | 1337 | 3 | 2813 | 11 | 134.428571 |
| hsa-miR-novel-chr8_33790 | 5p | hsa-mir-novel-chr8_33797 | 6637 | 22 | 8640 | 8 | 72167 | 582 | 121.920608 |
| hsa-miR-novel-chr5_27537 | 3p | hsa-mir-novel-chr5_27530 | 7 |  | 881 | 4 | 6088 | 46 | 108.892857 |
| hsa-miR-novel-chr16_9141 | 5p | hsa-mir-novel-chr16_9147 | 353 | 1 | 353 | 1 | 2173 | 11 | 103.952381 |
| hsa-miR-21-5p | 5p | hsa-mir-6087 | 29 | 1 | 248 | 1 | 1636 | 12 | 74.818182 |
| hsa-miR-novel-chr2_21226 | 3p | hsa-mir-novel-chr2_21226 | 164 |  | 219 |  | 866 | 2 | 73 |
| hsa-miR-224-5p | 5p | hsa-mir-224 | 29 |  | 197 | 1 | 609 | 1 | 56.272727 |
| hsa-miR-novel-chr3_22950 | 5p | hsa-mir-novel-chr3_22950 | 142 | 2 | 262 | 6 | 1516 | 24 | 44.882353 |
| hsa-miR-novel-chr16_8942 | 3p | hsa-mir-novel-chr16_8942 | 25982 | 110 | 25982 | 110 | 98966 | 2633 | 37.448354 |
| hsa-miR-novel-chr3_23863 | 5p | hsa-mir-novel-chr3_23863 | 11 | 1 | 233 | 4 | 589 | 7 | 35.235294 |
| hsa-miR-novel-chr13_5694 | 3p | hsa-mir-novel-chr13_5694 | 22 |  | 361 | 8 | 1314 | 30 | 33.1 |
| hsa-miR-novel-chr2_21247 | 5p | hsa-mir-novel-chr2_21247 | 11 |  | 51 |  | 280 | 3 | 22.307692 |
| hsa-miR-3195 | 5p | hsa-mir-3195 | 15 |  | 47 |  | 146 |  | 15.6 |
| hsa-miR-375 | 3p | hsa-mir-375 | 62 |  | 62 |  | 130 |  | 14 |
| hsa-miR-204-5p | 5p | hsa-mir-204 | 51 | 1 | 51 | 1 | 142 | 1 | 13.818182 |
| hsa-let-7c-5p | 5p | hsa-let-7c | 2076 | 93 | 2076 | 93 | 3687 | 258 | 13.794776 |
| hsa-miR-206 | 3p | hsa-mir-206 | 29 |  | 36 |  | 126 |  | 13.6 |
| hsa-miR-146b-5p | 5p | hsa-mir-146b | 510 | 9 | 2036 | 11 | 5903 | 431 | 13.408163 |
| hsa-miR-9-5p | 5p | hsa-mir-9-1 | 430 | 29 | 430 | 29 | 1025 | 76 | 12.034884 |
| hsa-miR-9-5p | 5p | hsa-mir-9-2 | 430 | 29 | 430 | 29 | 1025 | 76 | 12.034884 |
| hsa-miR-9-5p | 5p | hsa-mir-9-3 | 430 | 29 | 430 | 29 | 1025 | 76 | 12.034884 |
| hsa-miR-1298-5p | 5p | hsa-mir-1298 | 106 | 3 | 106 | 3 | 153 | 4 | 11.642857 |
| hsa-miR-203a-3p | 3p | hsa-mir-203a | 25 | 4 | 84 | 1 | 222 | 10 | 11.6 |
| hsa-miR-143-3p | 3p | hsa-mir-143 | 769 | 91 | 1067 | 81 | 3728 | 324 | 11.191617 |
| hsa-miR-486-5p | 5p | hsa-mir-486-1 | 113 | 10 | 113 | 10 | 310 | 21 | 10.322581 |
| hsa-miR-199a-5p | 5p | hsa-mir-199a-1 | 69 | 1 | 69 | 1 | 102 | 1 | 10.181818 |
| hsa-miR-199a-5p | 5p | hsa-mir-199a-2 | 69 | 1 | 69 | 1 | 102 | 1 | 10.181818 |
| hsa-miR-486-5p | 5p | hsa-mir-486-2 | 113 | 10 | 113 | 10 | 295 | 22 | 9.53125 |
| hsa-miR-214-3p | 3p | hsa-mir-214 | 15 | 1 | 29 |  | 91 | 1 | 9.181818 |
| hsa-miR-192-5p | 5p | hsa-mir-192 | 357 | 130 | 2087 | 42 | 8400 | 929 | 8.956337 |
| hsa-miR-125b-5p | 5p | hsa-mir-125b-1 | 142 | 18 | 142 | 18 | 579 | 56 | 8.924242 |
| hsa-miR-125b-5p | 5p | hsa-mir-125b-2 | 142 | 18 | 142 | 18 | 561 | 56 | 8.651515 |
| hsa-miR-381-3p | 3p | hsa-mir-381 | 182 | 14 | 182 | 14 | 241 | 20 | 8.366667 |
| hsa-miR-451a | 5p | hsa-mir-451a | 372 | 65 | 12690 | 1752 | 17341 | 2472 | 6.990733 |
| hsa-miR-novel-chr21_17384 | 5p | hsa-mir-novel-chr21_17384 | 22 | 1 | 22 | 1 | 65 | 1 | 6.818182 |
| hsa-miR-139-5p | 5p | hsa-mir-139 | 117 | 12 | 117 | 12 | 179 | 19 | 6.517241 |
| hsa-miR-452-5p | 5p | hsa-mir-452 | 7 |  | 22 | 1 | 61 | 1 | 6.454545 |
| hsa-miR-219a-2-3p | 3p | hsa-mir-219a-2 | 33 | 2 | 33 | 2 | 65 | 2 | 6.25 |
| hsa-miR-142-5p | 5p | hsa-mir-142 | 18 |  | 22 | 1 | 54 | 1 | 5.818182 |
| hsa-miR-129-5p | 5p | hsa-mir-129-1 | 76 | 10 | 102 | 11 | 210 | 28 | 5.789474 |
| hsa-miR-129-5p | 5p | hsa-mir-129-2 | 76 | 10 | 102 | 11 | 210 | 28 | 5.789474 |
| hsa-miR-99a-5p | 5p | hsa-mir-99a | 514 | 242 | 3548 | 411 | 7362 | 1292 | 5.662058 |
| hsa-miR-379-5p | 5p | hsa-mir-379 | 36 | 4 | 36 | 4 | 83 | 7 | 5.470588 |
| hsa-miR-128-3p | 3p | hsa-mir-128-1 | 627 | 181 | 1093 | 126 | 2847 | 547 | 5.129264 |
| hsa-miR-483-5p | 5p | hsa-mir-483 | 15 |  | 15 |  | 40 |  | 5 |
| hsa-miR-582-3p | 5p | hsa-mir-582 | 11 |  | 15 |  | 40 |  | 5 |
| hsa-miR-144-3p | 3p | hsa-mir-144 | 36 | 1 | 36 | 1 | 43 | 1 | 4.818182 |
| hsa-miR-126-3p | 3p | hsa-mir-126 | 1235 | 179 | 1235 | 179 | 3409 | 701 | 4.80872 |
| hsa-miR-411-5p | 5p | hsa-mir-411 |  | 1 | 22 | 1 | 62 | 5 | 4.8 |
| hsa-miR-363-3p | 3p | hsa-mir-363 | 51 | 5 | 51 | 5 | 81 | 10 | 4.55 |
| hsa-miR-495-3p | 3p | hsa-mir-495 | 33 | 1 | 33 | 1 | 40 | 1 | 4.545455 |
| hsa-miR-9-3p | 3p | hsa-mir-9-1 | 18 | 1 | 18 | 1 | 43 | 2 | 4.416667 |
| hsa-miR-9-3p | 3p | hsa-mir-9-2 | 18 | 1 | 18 | 1 | 43 | 2 | 4.416667 |
| hsa-miR-9-3p | 3p | hsa-mir-9-3 | 18 | 1 | 18 | 1 | 43 | 2 | 4.416667 |
| hsa-miR-novel-chr16_8999 | 5p | hsa-mir-novel-chr16_8999 | 11 | 1 | 18 |  | 47 | 3 | 4.384615 |
| hsa-miR-novel-chr1_14672 | 3p | hsa-mir-novel-chr1_14672 | 55 | 10 | 55 | 10 | 116 | 19 | 4.344828 |
| hsa-miR-145-3p | 3p | hsa-mir-145 | 15 | 1 | 15 | 1 | 37 | 1 | 4.272727 |
| hsa-miR-370-3p | 3p | hsa-mir-370 | 25 | 1 | 25 | 1 | 36 | 1 | 4.181818 |
| hsa-miR-136-3p | 3p | hsa-mir-136 | 18 | 1 | 18 | 1 | 40 | 2 | 4.166667 |
| hsa-miR-543 | 3p | hsa-mir-543 | 40 | 2 | 40 | 2 | 40 | 2 | 4.166667 |
| hsa-miR-218-5p | 5p | hsa-mir-218-2 | 171 | 24 | 171 | 24 | 247 | 55 | 3.953846 |
| hsa-miR-433-3p | 3p | hsa-mir-433 | 33 | 1 | 33 | 1 | 33 | 1 | 3.909091 |
| hsa-miR-134-5p | 5p | hsa-mir-134 | 7 | 1 | 11 |  | 32 | 1 | 3.818182 |
| hsa-miR-128-3p | 3p | hsa-mir-128-2 | 627 | 181 | 627 | 181 | 1455 | 378 | 3.775773 |
| hsa-miR-194-5p | 5p | hsa-mir-194-1 | 80 | 37 | 80 | 37 | 222 | 54 | 3.625 |
| hsa-miR-127-3p | 3p | hsa-mir-127 | 22 | 2 | 22 | 2 | 51 | 8 | 3.388889 |
| hsa-miR-328-3p | 3p | hsa-mir-328 | 109 | 20 | 109 | 20 | 156 | 39 | 3.387755 |
| hsa-miR-199a-3p | 3p | hsa-mir-199a-1 | 18 | 2 | 33 | 6 | 73 | 15 | 3.32 |
| hsa-miR-199a-3p | 3p | hsa-mir-199a-2 | 18 | 2 | 33 | 6 | 73 | 15 | 3.32 |
| hsa-miR-199b-3p | 3p | hsa-mir-199b | 18 | 2 | 33 | 6 | 73 | 15 | 3.32 |
| hsa-miR-205-5p | 5p | hsa-mir-205 |  | 1 | 15 |  | 26 | 1 | 3.272727 |
| hsa-miR-218-5p | 5p | hsa-mir-218-1 | 171 | 24 | 171 | 24 | 247 | 69 | 3.253165 |
| hsa-miR-142-3p | 3p | hsa-mir-142 | 15 |  | 15 |  | 22 |  | 3.2 |
| hsa-miR-150-5p | 5p | hsa-mir-150 | 7 | 1 | 11 |  | 25 | 1 | 3.181818 |
| hsa-miR-novel-chr12_3657 | 3p | hsa-mir-novel-chr12_3657 | | 1 | 33 |  | 138 | 37 | 3.148936 |
| hsa-let-7b-5p | 5p | hsa-let-7b | 2324 | 885 | 2324 | 885 | 5423 | 1841 | 2.93517 |
| hsa-miR-145-5p | 5p | hsa-mir-145 | 18 | 2 | 18 | 2 | 25 | 2 | 2.916667 |
| hsa-miR-409-3p | 3p | hsa-mir-409 | 22 | 1 | 22 | 1 | 22 | 1 | 2.909091 |
| hsa-miR-323a-3p | 3p | hsa-mir-323a | 7 | 1 | 7 | 1 | 21 | 1 | 2.818182 |
| hsa-miR-194-5p | 5p | hsa-mir-194-2 | 80 | 37 | 80 | 37 | 280 | 93 | 2.815534 |
| hsa-miR-1269a | 3p | hsa-mir-1269a | 18 |  | 18 |  | 18 |  | 2.8 |
| hsa-miR-296-3p | 3p | hsa-mir-296 | 7 |  | 11 |  | 18 |  | 2.8 |
| hsa-miR-493-5p | 5p | hsa-mir-493 | 18 |  | 18 |  | 18 |  | 2.8 |
| hsa-miR-320c | 3p | hsa-mir-320c-1 | 113 | 32 | 113 | 32 | 138 | 44 | 2.740741 |
| hsa-miR-novel-chr9_35237 | 5p | hsa-mir-novel-chr9_35237 | | 1 | 15 | 2 | 58 | 15 | 2.72 |
| hsa-miR-127-5p | 5p | hsa-mir-127 |  | 1 | 11 |  | 25 | 3 | 2.692308 |
| hsa-miR-148a-3p | 3p | hsa-mir-148a | 16271 | 5894 | 16271 | 5894 | 22641 | 8599 | 2.631084 |
| hsa-miR-382-5p | 5p | hsa-mir-382 | 7 | 1 | 11 |  | 18 | 1 | 2.545455 |
| hsa-miR-novel-chr1_14730 | 3p | hsa-mir-novel-chr1_14730 | 11 | 1 | 11 | 1 | 18 | 1 | 2.545455 |
| hsa-miR-1-3p | 3p | hsa-mir-1-1 | 546 | 199 | 546 | 199 | 754 | 294 | 2.513158 |
| hsa-miR-novel-chr18_11404 | 3p | hsa-mir-novel-chr18_11404 | 546 | 199 | 546 | 199 | 754 | 295 | 2.504918 |
| hsa-miR-511-5p | 5p | hsa-mir-511 | 15 |  | 15 |  | 15 |  | 2.5 |
| hsa-miR-1-3p | 3p | hsa-mir-1-2 | 546 | 199 | 546 | 199 | 754 | 305 | 2.425397 |
| hsa-miR-34c-5p | 5p | hsa-mir-34c | 44 | 14 | 47 | 17 | 113 | 41 | 2.411765 |
| hsa-miR-125b-1-3p | 3p | hsa-mir-125b-1 | 15 | 3 | 15 | 3 | 26 | 5 | 2.4 |
| hsa-miR-410-3p | 3p | hsa-mir-410 | 15 | 1 | 15 | 1 | 15 | 1 | 2.272727 |
| hsa-miR-200c-3p | 3p | hsa-mir-200c | 36 | 2 | 36 | 2 | 65 | 24 | 2.205882 |
| hsa-miR-409-5p | 5p | hsa-mir-409 | 7 |  | 7 |  | 14 | 1 | 2.181818 |

**Table S2 Information of down-regulated miRs**

| **miRNA information** | | | **TagCount_Mature_Alone** | | **TagCount_Most_Abundant_Seq** | | **TagCount_ALL_Isoform** | | **Fold Change** |
| --- | --- | --- | --- | --- | --- | --- | --- | --- | --- |
| **MATURE-ID** | **pre-miRNA arm (5p or 3p)** | **PRE-ID** | **Model** | **Control** | **Model** | **Control** | **Model** | **Control** | **Model vs Control Fold change** |
| hsa-let-7f-1-3p | 3p | hsa-let-7f-1 |  | 5 | 7 | 28 | 7 | 53 | 0.269841 |
| hsa-let-7f-5p | 5p | hsa-let-7f-1 | 2553 | 10846 | 2553 | 10846 | 4765 | 18120 | 0.263376 |
| hsa-miR-484 | 5p | hsa-mir-484 | 22 | 100 | 22 | 100 | 84 | 347 | 0.263305 |
| hsa-miR-361-5p | 5p | hsa-mir-361 | 11 | 34 | 11 | 34 | 36 | 166 | 0.261364 |
| hsa-miR-30c-1-3p | 3p | hsa-mir-30c-1 |  | 6 |  | 11 |  | 29 | 0.25641 |
| hsa-miR-98-3p | 3p | hsa-mir-98 |  | 2 |  | 12 |  | 29 | 0.25641 |
| hsa-miR-novel-chr8_34034 | 3p | hsa-mir-novel-chr8_34034 | | 3 |  | 11 |  | 29 | 0.25641 |
| hsa-miR-1303 | 3p | hsa-mir-1303 | 7 | 13 |  | 35 | 14 | 84 | 0.255319 |
| hsa-let-7i-3p | 3p | hsa-let-7i |  | 13 |  | 13 |  | 30 | 0.25 |
| hsa-miR-421 | 3p | hsa-mir-421 |  | 7 |  | 11 |  | 30 | 0.25 |
| hsa-miR-429 | 3p | hsa-mir-429 | 29 | 113 | 29 | 113 | 43 | 202 | 0.25 |
| hsa-miR-29b-1-5p | 5p | hsa-mir-29b-1 |  | 11 |  | 11 |  | 31 | 0.243902 |
| hsa-miR-novel-chr11_2387 | 5p | hsa-mir-novel-chr11_2387 | | 4 |  | 14 |  | 31 | 0.243902 |
| hsa-miR-147b | 3p | hsa-mir-147b |  | 10 | 44 | 55 | 88 | 404 | 0.236715 |
| hsa-miR-378i | 5p | hsa-mir-378i |  | 1 | 208 | 869 | 219 | 958 | 0.23657 |
| hsa-miR-28-3p | 3p | hsa-mir-28 | 168 | 659 | 168 | 659 | 337 | 1469 | 0.234618 |
| hsa-miR-941 | 3p | hsa-mir-941-1 | 22 | 102 | 33 | 131 | 77 | 365 | 0.232 |
| hsa-miR-941 | 3p | hsa-mir-941-2 | 22 | 102 | 33 | 131 | 77 | 365 | 0.232 |
| hsa-miR-941 | 3p | hsa-mir-941-3 | 22 | 102 | 33 | 131 | 77 | 365 | 0.232 |
| hsa-miR-941 | 3p | hsa-mir-941-4 | 22 | 102 | 33 | 131 | 77 | 365 | 0.232 |
| hsa-miR-941 | 3p | hsa-mir-941-5 | 22 | 102 | 33 | 131 | 77 | 365 | 0.232 |
| hsa-miR-29c-3p | 3p | hsa-mir-29c |  | 12 |  | 12 |  | 35 | 0.222222 |
| hsa-miR-15a-5p | 5p | hsa-mir-15a | 7 | 6 |  | 21 | 7 | 67 | 0.220779 |
| hsa-miR-152-3p | 3p | hsa-mir-152 | 66 | 305 | 66 | 305 | 239 | 1120 | 0.220354 |
| hsa-miR-10a-5p | 5p | hsa-mir-10a | 211 | 1177 | 554 | 2249 | 1724 | 7927 | 0.21847 |
| hsa-miR-374b-3p | 3p | hsa-mir-374b |  | 28 |  | 28 |  | 37 | 0.212766 |
| hsa-miR-331-5p | 5p | hsa-mir-331 |  | 2 | 7 | 14 | 7 | 70 | 0.2125 |
| hsa-let-7g-5p | 5p | hsa-let-7g | 2346 | 13969 | 2346 | 13969 | 4653 | 22367 | 0.208384 |
| hsa-miR-149-5p | 5p | hsa-mir-149 |  | 21 |  | 113 | 69 | 370 | 0.207895 |
| hsa-miR-99b-3p | 3p | hsa-mir-99b | 33 | 45 | 33 | 45 | 70 | 377 | 0.206718 |
| hsa-miR-novel-chrX_37172 | 3p | hsa-mir-novel-chrX_37172 | | 2 |  | 4 |  | 39 | 0.204082 |
| hsa-miR-92b-3p | 3p | hsa-mir-92b | 36 | 171 | 80 | 293 | 225 | 1142 | 0.203993 |
| hsa-miR-novel-chr10_403 | 3p | hsa-mir-novel-chr10_403 | | 1 |  | 4 |  | 41 | 0.196078 |
| hsa-miR-27a-5p | 5p | hsa-mir-27a | 62 | 202 | 62 | 202 | 80 | 450 | 0.195652 |
| hsa-miR-92b-5p | 5p | hsa-mir-92b |  | 1 |  | 14 |  | 43 | 0.188679 |
| hsa-miR-548am-3p | 3p | hsa-mir-548am |  | 9 |  | 33 |  | 44 | 0.185185 |
| hsa-miR-7-5p | 5p | hsa-mir-7-3 | 51 | 239 | 350 | 1626 | 525 | 2883 | 0.184929 |
| hsa-miR-503-5p | 5p | hsa-mir-503 |  | 12 | 18 | 38 | 43 | 277 | 0.184669 |
| hsa-miR-7-5p | 5p | hsa-mir-7-2 | 51 | 239 | 350 | 1626 | 525 | 2891 | 0.184419 |
| hsa-miR-7-5p | 5p | hsa-mir-7-1 | 51 | 239 | 350 | 1626 | 543 | 2995 | 0.184027 |
| hsa-miR-26b-5p | 5p | hsa-mir-26b | 164 | 378 | 335 | 2244 | 776 | 4267 | 0.183774 |
| hsa-miR-30d-3p | 3p | hsa-mir-30d |  | 16 |  | 21 | 7 | 83 | 0.182796 |
| hsa-miR-183-5p | 5p | hsa-mir-183 | 171 | 1121 | 171 | 1121 | 486 | 2711 | 0.182286 |
| hsa-miR-542-3p | 3p | hsa-mir-542 |  | 35 |  | 35 | 7 | 86 | 0.177083 |
| hsa-miR-30e-5p | 5p | hsa-mir-30e | 11 | 101 | 277 | 1556 | 512 | 2963 | 0.17558 |
| hsa-miR-378a-5p | 5p | hsa-mir-378a |  | 22 |  | 22 |  | 47 | 0.175439 |
| hsa-miR-361-3p | 3p | hsa-mir-361 | 25 | 275 | 25 | 275 | 206 | 1270 | 0.16875 |
| hsa-miR-374a-5p | 5p | hsa-mir-374a | 7 | 147 | 7 | 147 | 50 | 346 | 0.168539 |
| hsa-miR-548u | 3p | hsa-mir-548u |  | 1 |  | 24 |  | 51 | 0.163934 |
| hsa-miR-30a-3p | 3p | hsa-mir-30a | 127 | 1099 | 200 | 1407 | 784 | 4840 | 0.163711 |
| hsa-let-7f-2-3p | 3p | hsa-let-7f-2 |  | 9 | 7 | 62 | 7 | 94 | 0.163462 |
| hsa-miR-200b-3p | 3p | hsa-mir-200b | 186 | 785 | 189 | 1353 | 976 | 6026 | 0.163353 |
| hsa-miR-181a-2-3p | 3p | hsa-mir-181a-2 | 22 | 112 | 18 | 185 | 65 | 454 | 0.161638 |
| hsa-miR-23a-3p | 3p | hsa-mir-23a | 106 | 367 | 98 | 721 | 484 | 3085 | 0.159612 |
| hsa-miR-151b | 3p | hsa-mir-151b |  | 3 |  | 21 |  | 54 | 0.15625 |
| hsa-miR-29a-5p | 5p | hsa-mir-29a |  | 2 |  | 9 |  | 54 | 0.15625 |
| hsa-miR-324-5p | 5p | hsa-mir-324 |  | 25 |  | 25 |  | 54 | 0.15625 |
| hsa-miR-106a-5p | 5p | hsa-mir-106a |  | 1 |  | 26 |  | 56 | 0.151515 |
| hsa-miR-584-5p | 5p | hsa-mir-584 |  | 3 | 7 | 54 | 14 | 151 | 0.149068 |
| hsa-miR-221-3p | 3p | hsa-mir-221 | 386 | 1091 | 306 | 3466 | 1343 | 9226 | 0.146492 |
| hsa-miR-18a-5p | 5p | hsa-mir-18a |  | 15 |  | 15 |  | 59 | 0.144928 |
| hsa-miR-450b-5p | 5p | hsa-mir-450b |  | 12 |  | 31 |  | 59 | 0.144928 |
| hsa-miR-novel-chr17_10809 | 5p | hsa-mir-novel-chr17_10809 | | 1 |  | 17 |  | 59 | 0.144928 |
| hsa-miR-138-5p | 5p | hsa-mir-138-2 |  | 14 |  | 14 |  | 61 | 0.140845 |
| hsa-miR-576-3p | 3p | hsa-mir-576 |  | 14 |  | 14 |  | 61 | 0.140845 |
| hsa-miR-4286 | 5p | hsa-mir-4286 |  | 6 |  | 21 |  | 62 | 0.138889 |
| hsa-miR-339-3p | 3p | hsa-mir-339 |  | 10 |  | 30 | 7 | 114 | 0.137097 |
| hsa-miR-novel-chr18_11121 | 3p | hsa-mir-novel-chr18_11121 | | 10489 | 1158 | 10489 | 2786 | 20751 | 0.134676 |
| hsa-miR-574-5p | 5p | hsa-mir-574 |  | 25 | 7 | 21 | 7 | 119 | 0.131783 |
| hsa-miR-130b-3p | 3p | hsa-mir-130b |  | 16 |  | 17 |  | 66 | 0.131579 |
| hsa-miR-novel-chr17_10637 | 5p | hsa-mir-novel-chr17_10637 | | 16 |  | 17 |  | 66 | 0.131579 |
| hsa-miR-19b-3p | 3p | hsa-mir-19b-1 | 7 | 66 | 7 | 66 | 7 | 123 | 0.12782 |
| hsa-miR-516a-5p | 5p | hsa-mir-516a-1 |  | 4 |  | 43 |  | 69 | 0.126582 |
| hsa-miR-516a-5p | 5p | hsa-mir-516a-2 |  | 4 |  | 43 |  | 69 | 0.126582 |
| hsa-miR-107 | 3p | hsa-mir-107 | 7 | 15 |  | 61 | 14 | 180 | 0.126316 |
| hsa-miR-103a-3p | 3p | hsa-mir-103a-1 | 208 | 1428 | 208 | 1428 | 277 | 2282 | 0.125218 |
| hsa-miR-590-3p | 3p | hsa-mir-590 |  | 29 |  | 29 |  | 71 | 0.123457 |
| hsa-miR-novel-chr5_28348 | 3p | hsa-mir-novel-chr5_28348 | 208 | 1428 | 208 | 1428 | 342 | 2871 | 0.12218 |
| hsa-miR-103a-3p | 3p | hsa-mir-103a-2 | 208 | 1428 | 208 | 1428 | 277 | 2340 | 0.122128 |
| hsa-miR-31-3p | 3p | hsa-mir-31 |  | 2 |  | 31 |  | 72 | 0.121951 |
| hsa-miR-3613-5p | 5p | hsa-mir-3613 |  | 33 |  | 33 |  | 73 | 0.120482 |
| hsa-miR-19b-3p | 3p | hsa-mir-19b-2 | 7 | 66 | 7 | 66 | 7 | 132 | 0.119718 |
| hsa-miR-15b-5p | 5p | hsa-mir-15b | 11 | 203 | 11 | 203 | 29 | 317 | 0.119266 |
| hsa-miR-106b-3p | 3p | hsa-mir-106b | 36 | 136 | 15 | 368 | 196 | 1749 | 0.117112 |
| hsa-miR-30c-2-3p | 3p | hsa-mir-30c-2 | 22 | 317 | 22 | 317 | 58 | 572 | 0.116838 |
| hsa-miR-1307-5p | 5p | hsa-mir-1307 |  | 34 |  | 34 |  | 76 | 0.116279 |
| hsa-miR-425-3p | 3p | hsa-mir-425 |  | 5 | 15 | 55 | 15 | 205 | 0.116279 |
| hsa-miR-374b-5p | 5p | hsa-mir-374b | 11 | 61 | 18 | 145 | 29 | 326 | 0.116071 |
| hsa-miR-505-3p | 3p | hsa-mir-505 |  | 9 |  | 15 |  | 78 | 0.113636 |
| hsa-miR-1296-5p | 5p | hsa-mir-1296 |  | 14 |  | 28 |  | 79 | 0.11236 |
| hsa-miR-532-5p | 5p | hsa-mir-532 | 302 | 2312 | 302 | 2312 | 442 | 4052 | 0.111275 |
| hsa-miR-138-5p | 5p | hsa-mir-138-1 |  | 14 | 11 | 102 | 11 | 181 | 0.109948 |
| hsa-miR-200a-3p | 3p | hsa-mir-200a | 11 | 322 | 95 | 613 | 194 | 1861 | 0.109033 |
| hsa-miR-339-5p | 5p | hsa-mir-339 |  | 36 |  | 36 | 7 | 147 | 0.10828 |
| hsa-miR-199b-5p | 5p | hsa-mir-199b |  | 31 |  | 31 |  | 83 | 0.107527 |
| hsa-miR-21-5p | 5p | hsa-mir-21 | 5347 | 35960 | 14668 | 124775 | 42974 | 399768 | 0.10752 |
| hsa-miR-29a-3p | 3p | hsa-mir-29a | 131 | 4452 | 131 | 4452 | 1585 | 14951 | 0.106611 |
| hsa-miR-197-3p | 3p | hsa-mir-197 | 40 | 196 | 40 | 196 | 47 | 525 | 0.106542 |
| hsa-miR-877-5p | 5p | hsa-mir-877 |  | 2 |  | 14 |  | 85 | 0.105263 |
| hsa-miR-16-5p | 5p | hsa-mir-16-2 | 25 | 273 | 15 | 372 | 116 | 1191 | 0.104913 |
| hsa-miR-326 | 3p | hsa-mir-326 |  | 7 |  | 57 |  | 88 | 0.102041 |
| hsa-miR-548o-3p | 3p | hsa-mir-548o-2 |  | 37 |  | 37 |  | 88 | 0.102041 |
| hsa-miR-548o-3p | 3p | hsa-mir-548o |  | 37 |  | 37 |  | 88 | 0.102041 |
| hsa-miR-345-5p | 5p | hsa-mir-345 |  | 12 |  | 22 |  | 89 | 0.10101 |
| hsa-miR-340-5p | 5p | hsa-mir-340 | 73 | 851 | 73 | 851 | 124 | 1344 | 0.098966 |
| hsa-miR-500a-3p | 3p | hsa-mir-500a | 7 | 42 | 11 | 108 | 40 | 502 | 0.097656 |
| hsa-miR-500a-5p | 5p | hsa-mir-500a |  | 4 |  | 49 |  | 93 | 0.097087 |
| hsa-miR-148b-3p | 3p | hsa-mir-148b | 142 | 1238 | 47 | 1500 | 374 | 3976 | 0.096337 |
| hsa-miR-501-3p | 3p | hsa-mir-501 | 11 | 98 | 11 | 98 | 11 | 208 | 0.09633 |
| hsa-miR-10a-3p | 3p | hsa-mir-10a |  | 1 |  | 64 |  | 98 | 0.092593 |
| hsa-miR-502-3p | 3p | hsa-mir-502 | 18 | 103 | 18 | 103 | 18 | 295 | 0.091803 |
| hsa-miR-200a-5p | 5p | hsa-mir-200a | 33 | 266 | 33 | 266 | 33 | 476 | 0.088477 |
| hsa-miR-93-5p | 5p | hsa-mir-93 | 120 | 1139 | 120 | 1139 | 244 | 2938 | 0.08616 |
| hsa-miR-210-3p | 3p | hsa-mir-210 | 22 | 119 | 22 | 119 | 44 | 661 | 0.080477 |
| hsa-miR-34a-5p | 5p | hsa-mir-34a |  | 78 |  | 78 | 7 | 207 | 0.078341 |
| hsa-miR-532-3p | 3p | hsa-mir-532 |  | 53 |  | 53 |  | 118 | 0.078125 |
| hsa-miR-130a-3p | 3p | hsa-mir-130a |  | 41 | 11 | 141 | 18 | 372 | 0.073298 |
| hsa-miR-17-5p | 5p | hsa-mir-17 | 102 | 1369 | 102 | 1369 | 251 | 3640 | 0.071507 |
| hsa-miR-182-5p | 5p | hsa-mir-182 | 244 | 5152 | 244 | 5152 | 642 | 10709 | 0.060827 |
| hsa-miR-454-3p | 3p | hsa-mir-454 | 7 | 51 |  | 67 | 7 | 284 | 0.057823 |
| hsa-miR-30b-5p | 5p | hsa-mir-30b | 66 | 1092 | 66 | 1092 | 91 | 1770 | 0.056742 |
| hsa-miR-novel-chr1_13785 | 3p | hsa-mir-novel-chr1_13785 | | 1 | 15 | 442 | 22 | 560 | 0.05614 |
| hsa-miR-181a-3p | 3p | hsa-mir-181a-1 |  | 103 | 11 | 154 | 11 | 374 | 0.054688 |
| hsa-miR-455-3p | 3p | hsa-mir-455 |  | 9 | 7 | 106 | 7 | 301 | 0.054662 |
| hsa-miR-2682-5p | 5p | hsa-mir-2682 |  | 62 | 15 | 141 | 15 | 460 | 0.053191 |
| hsa-miR-15b-3p | 3p | hsa-mir-15b |  | 47 |  | 57 |  | 179 | 0.05291 |
| hsa-miR-660-5p | 5p | hsa-mir-660 |  | 30 | 18 | 503 | 29 | 782 | 0.049242 |
| hsa-miR-137 | 3p | hsa-mir-137 | 7 | 24 |  | 58 | 7 | 348 | 0.047486 |
| hsa-miR-20a-5p | 5p | hsa-mir-20a | 197 | 3144 | 197 | 3144 | 292 | 6377 | 0.047284 |
| hsa-miR-365a-5p | 5p | hsa-mir-365a | 15 | 265 | 15 | 265 | 15 | 527 | 0.046555 |
| hsa-miR-96-5p | 5p | hsa-mir-96 | 69 | 1530 | 69 | 1530 | 94 | 2409 | 0.042993 |
| hsa-miR-193b-3p | 3p | hsa-mir-193b | 33 | 618 | 33 | 618 | 44 | 1251 | 0.042823 |
| hsa-miR-151a-5p | 5p | hsa-mir-151a | 7 | 242 | 7 | 242 | 7 | 404 | 0.041063 |
| hsa-miR-589-5p | 5p | hsa-mir-589 |  | 4 |  | 89 |  | 239 | 0.040161 |
| hsa-miR-365a-3p | 3p | hsa-mir-365a |  | 57 |  | 57 |  | 248 | 0.03876 |
| hsa-miR-365b-3p | 3p | hsa-mir-365b |  | 57 |  | 57 |  | 248 | 0.03876 |
| hsa-miR-106b-5p | 5p | hsa-mir-106b | 7 | 331 | 11 | 459 | 36 | 1198 | 0.038079 |
| hsa-miR-342-3p | 3p | hsa-mir-342 |  | 40 | 7 | 171 | 7 | 444 | 0.037445 |
| hsa-miR-769-5p | 5p | hsa-mir-769 | 11 | 322 | 11 | 322 | 18 | 813 | 0.034022 |
| hsa-miR-30a-5p | 5p | hsa-mir-30a | 226 | 3667 | 1453 | 55894 | 4056 | 125559 | 0.032381 |
| hsa-miR-221-5p | 5p | hsa-mir-221 | 7 | 64 | 15 | 580 | 43 | 1674 | 0.031473 |
| hsa-miR-362-5p | 5p | hsa-mir-362 |  | 230 |  | 230 |  | 472 | 0.020747 |
| hsa-miR-6087 | 3p | hsa-mir-21 | 18 | 763 | 15 | 883 | 47 | 3511 | 0.016189 |
| hsa-miR-409-3p | 3p | hsa-mir-29b-1 | 7 | 661 | 7 | 661 | 7 | 1063 | 0.015843 |
| hsa-miR-29b-5p | 5p | hsa-mir-29b-2 | 7 | 661 | 7 | 661 | 7 | 1067 | 0.015785 |
| hsa-miR-374a-3p | 3p | hsa-mir-374a |  | 475 |  | 475 |  | 696 | 0.014164 |
